# Supplementary material for: Multicolor photonic patterns through an intensity-controlled single photopolymerization step
Source: Royal Society of Chemistry journal article supplement (doi:10.1039/d2cc04050f), 2022-01-01
Supplement: d2cc04050f1.pdf [file d2cc04050f1.pdf]

## Supporting Information

# Multicolor photonic patterns through an intensity-controlled single photopolymerization step

*Yari Foelen<sup>1</sup>, Nieké J. M. van Gils<sup>1</sup>, Mart D.T. Claessen<sup>1</sup>, Albertus P. H. J. Schenning<sup>1,2,3,\*</sup>*

|                              |                                                            |
|------------------------------|------------------------------------------------------------|
| <b>Table S1</b>              | <b>Mixture composition</b>                                 |
| <b>Figure S1</b>             | <b>SEM image</b>                                           |
| <b>Figure S2</b>             | <b>FT-IR spectra of monomer and polymers</b>               |
| <b>Figure S3</b>             | <b>DSC measurements</b>                                    |
| <b>Figure S4</b>             | <b>UV lamp irradiance and initiator absorption spectra</b> |
| <b>Materials and methods</b> | <b>Experimental details</b>                                |

Table S1. Mixture composition (\*compositional change to produce a blue reflecting CLC phase).

| Compound | Mixture 1 (wt %) | Mixture 2 (wt %) | Mixture 3 (wt %) |
|----------|------------------|------------------|------------------|
| 1        | 4                | 0                | 4 (5*)           |
| 2        | 6                | 0                | 3,5              |
| 3        | 52               | 92               | 56 (55*)         |
| 4        | 35               | 0                | 31               |
| 5        | 3                | 0                | 3                |
| 6        | 4                | 4                | 0,5              |
| 7        | 0                | 0                | 2                |
| 8        | 0                | 8                | 0                |

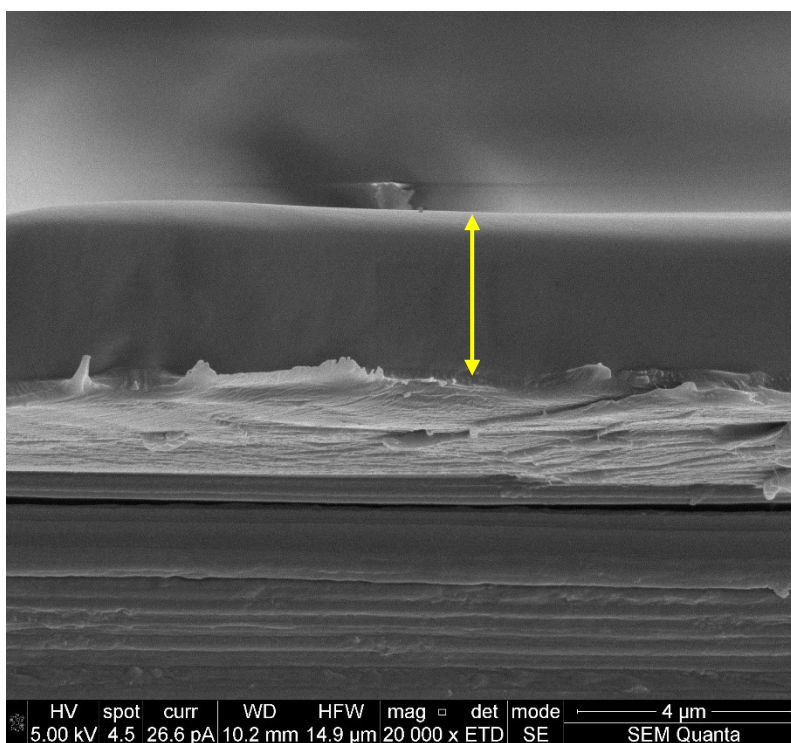

Figure S1. SEM image: a cross section of a polymer coating from mixture 1 on a PET substrate, indicating an average coating thickness  $\sim 3.5 \mu\text{m}$ .

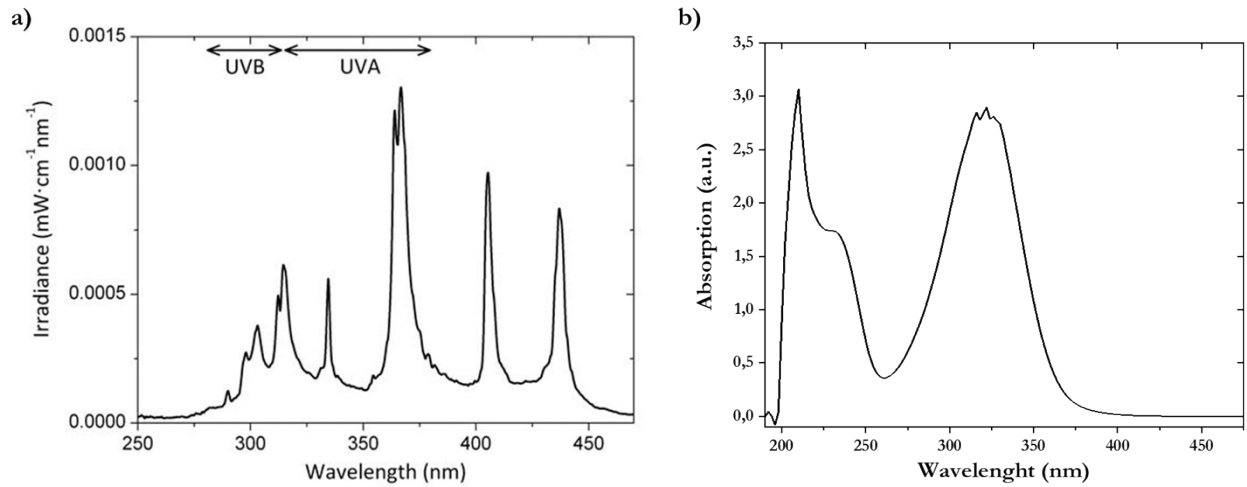

Figure S2. a) Spectrum of the OmniCure 2000 UV lamp irradiance (from specifications) b) Absorption spectrum of Initiator 6.

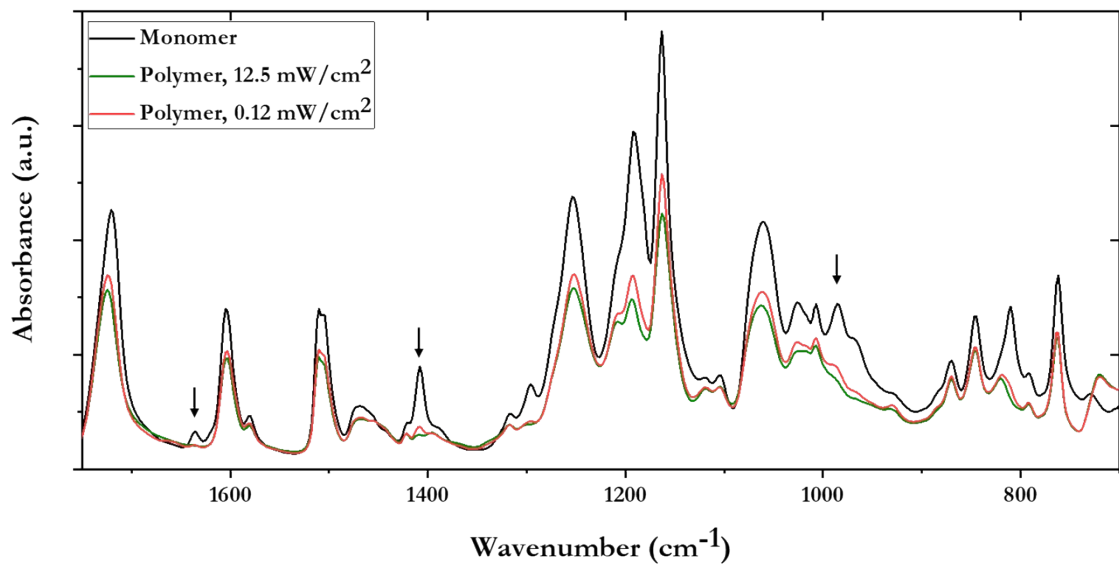

Figure S3. FT-IR spectra of monomer mixture 1 and the parts of the polymer coating polymerized at high (12.5 mW/cm<sup>2</sup>) and low (0.12 mW/cm<sup>2</sup>) UV intensity.

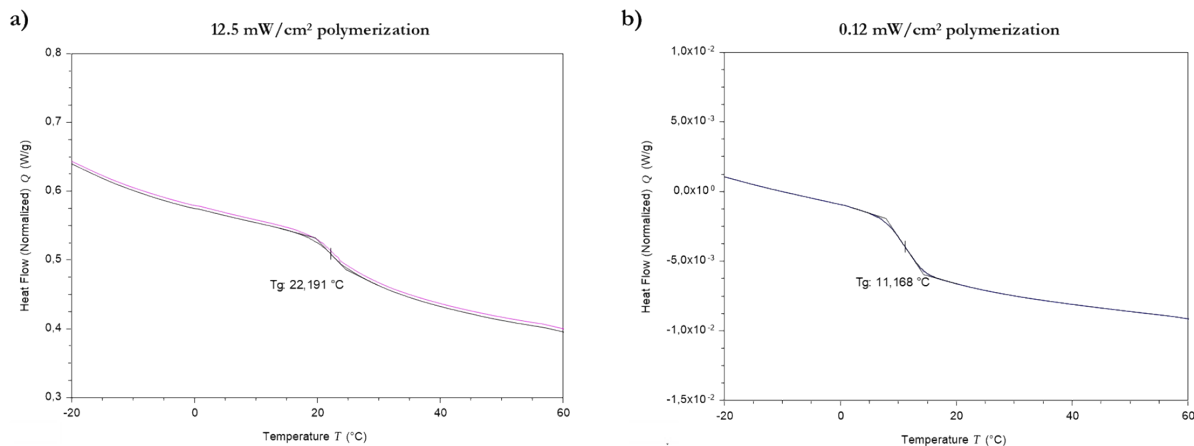

Figure S4. DSC measurements of photopolymerized mixture **1**, a) showing a Tg around 22°C for the (green) coating polymerized at 12.5 mW/cm<sup>2</sup> and b) a Tg around 11°C for the (red) coating polymerized at 0.12 mW/cm<sup>2</sup>.

#### Materials and methods.

*Materials:* (3R,3aS,6R,6aS)-hexahydrofuro[3,2-b] furan-3,6-diyl bis(4-(((4-(acryloyloxy)butoxy)carbonyl)oxy)benzoyl)oxy)benzoate) [**1**] and 2-methyl-1,4-phenylene bis(4-(((4-(acryloyloxy)butoxy) carbonyl)oxy)benzoate) [**2**] were obtained from BASF. 4-((6-(acryloyloxy)hexyl)oxy)phenyl 4-methoxybenzoate [**3**] was purchased from Synthron Chemicals. 4-cyanophenyl 4-((6-(acryloyloxy) hexyl)oxy)benzoate [**4**] and (S)-1-phenylethane-1,2-diyl bis(4-((1s,4S)-4-pentylcyclohexyl)benzoate) [**8**] were obtained from Merck. 2,2'-(ethane-1,2-diylbis(oxy))bis(ethane-1-thiol) [**5**] and 4-methoxyphenol [**7**] was purchased from Sigma-Aldrich. The photoinitiator 2-benzyl-2-(dimethylamino)-1-(4-morpholinophenyl) butan-1-one [**6**] was obtained from IGM resins. Surfactant BYK-361 N was purchased from BYK. Cyclopentanone was purchased from Acros. Neutral Optical Density filters were purchased from Thorlabs.

*Ink preparation:* The components were dissolved in cyclopentanone with surfactant BYK-361 N (0.1 wt%) (2:1 solids:solvent ratio), and the resulting solutions were filtered through a 0.2  $\mu\text{m}$  PTFE syringe filter.

*Gravure Printing:* The ink was printed at a speed of 0.5  $\text{m s}^{-1}$  on black flexible biaxially oriented PET substrates (Tenolan OCN0003, 36  $\mu\text{m}$  thickness) using an IGT F1 printability tester in a gravure printing mode. Afterward, the solvent was allowed to evaporate for  $\approx 2$  min at 70  $^{\circ}\text{C}$  and cooled for 60s at room temperature to align the CLC phase.

*Polymerization:* Photopolymerization was carried out with an Omnicure series 2000 EXFO lamp in a nitrogen box, additional ND filters (Thorlabs) were used to tune the exact UV intensity. The stepwise ND filter was applied with a ND of 0.1, 0.2, 0.3, 0.4, 0.5, 0.8, 1.0.

*Embossing:* A modified hot-stamp machine from KBA-Metronic GmbH was used to compress the surface of the coating into a rubberized metal sheet ( $R_a \approx 1 \mu\text{m}$ ) for 30 s at a pressure of 4.5 bar. The machine was fitted with a brass stamp heated to 40 $^{\circ}\text{C}$ .

*Characterization:* UV intensity of the polymerization setup was measured with a radiometer RM12 from Opsytec Dr. Gröbel with a UV-A (400-315 nm) sensor. The reflection of the CLC coatings was measured through ultraviolet–visible spectroscopy, using a PerkinElmer LAMBDA 750 with a 150 mm integrating sphere over a range of 400–750 nm. A Varian 670 FT-IR spectrometer with slide-on ATR (Ge) was used to record IR spectra. Thermogravimetric analysis was performed in a TA Instruments TGA Q500 with a constant heating rate of 5  $^{\circ}\text{C}/\text{min}$ . Thermal transitions of the liquid crystalline coatings were analyzed by differential scanning calorimetry using a TA Instruments DSC Q2000 calorimeter with constant heating and cooling rates of 10  $^{\circ}\text{C}/\text{min}$ . GPC was performed on a Shimadzu Prominence-I LC-2030C high-performance liquid

chromatography (HPLC) equipped with photodiode array and refractive index detectors. Polystyrene (PS) standards and a  $1 \text{ mL min}^{-1}$   $\text{CHCl}_3$  flow rate were used.
